# Supplementary material for: CONCORD biomarker prediction for novel drug introduction to different cancer types
Source: PubMed Central journal article supplement (PMC5787421; doi:10.18632/oncotarget.23124), 2017-12-09
Supplement: oncotarget-09-1091-s001.pdf [file oncotarget-09-1091-s001.pdf]

# CONCORD biomarker prediction for novel drug introduction to different cancer types

## SUPPLEMENTARY MATERIALS

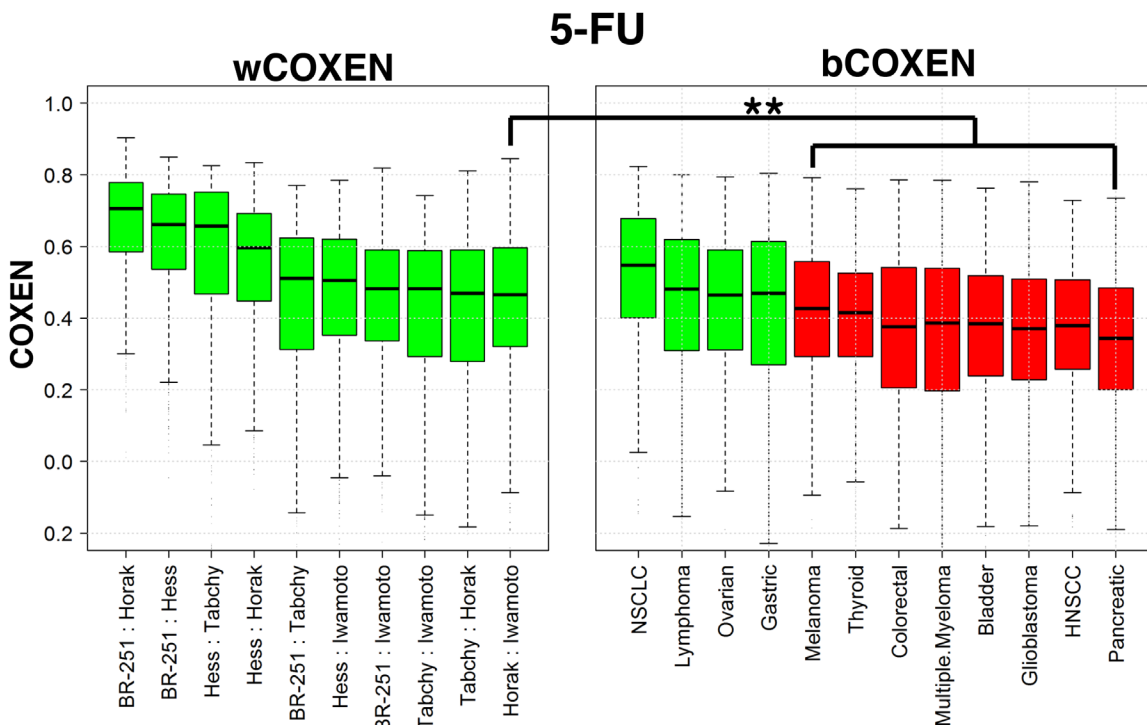

Supplementary Figure 1: 5-Fu: identification of cancer types for CONCORD prediction.

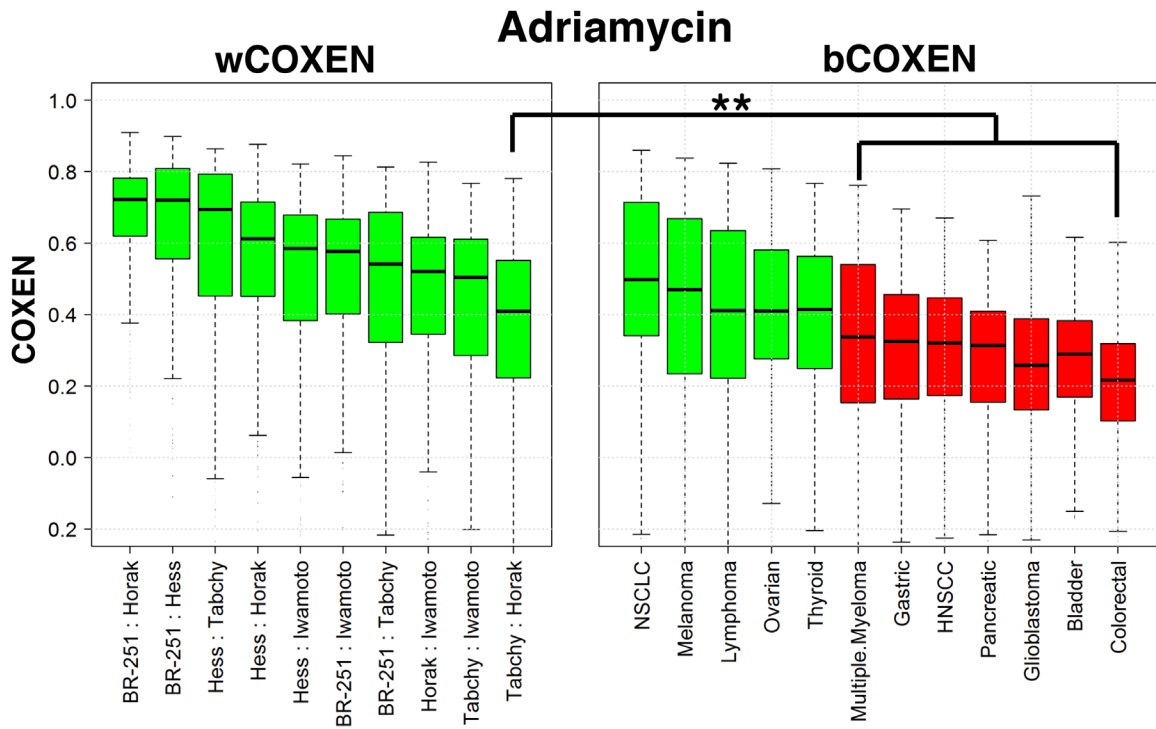

Supplementary Figure 2: Adriamycin: identification of cancer types for CONCORD prediction.

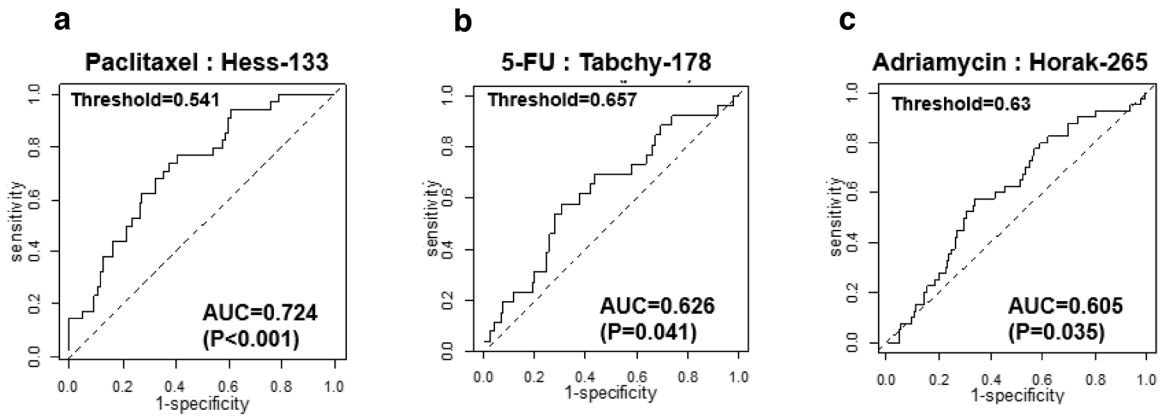

Supplementary Figure 3: ROC curves of final CONCORD models on breast cancer test sets.

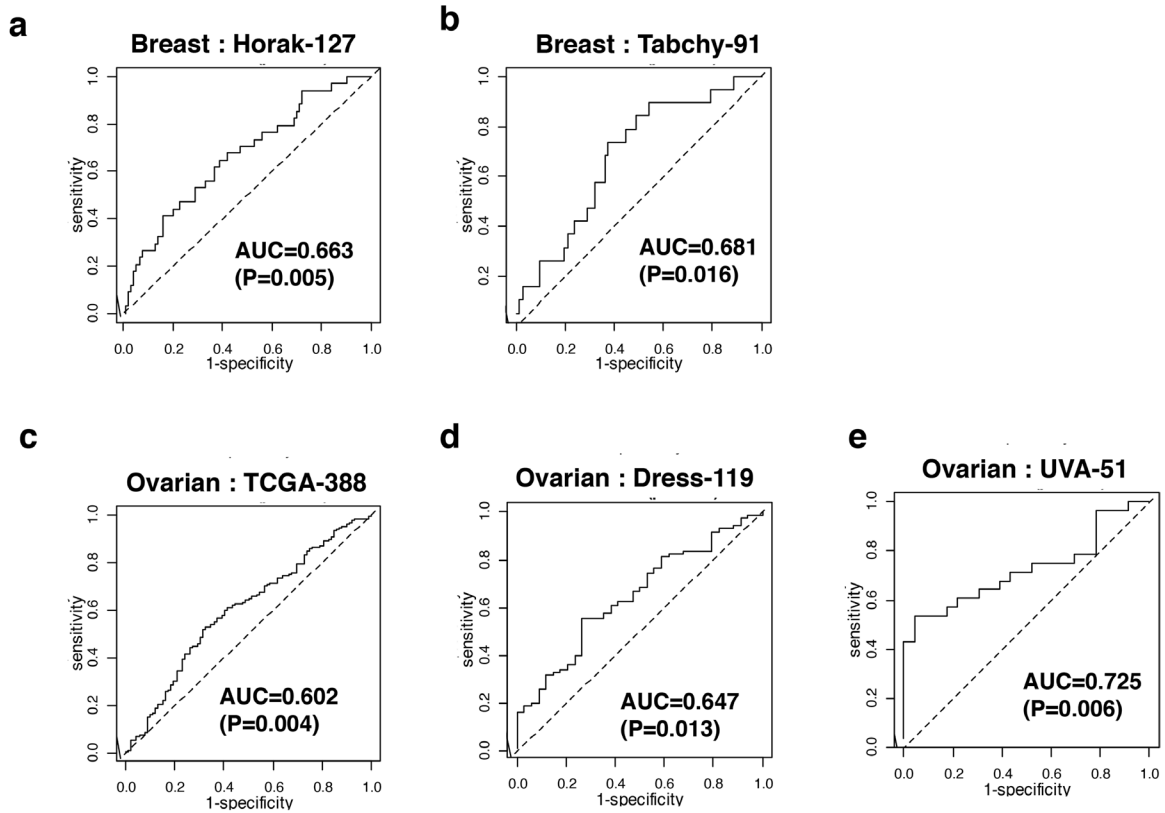

Supplementary Figure 4: Paclitaxel: ROC curves of CONCORD prediction on breast and ovarian cancers.

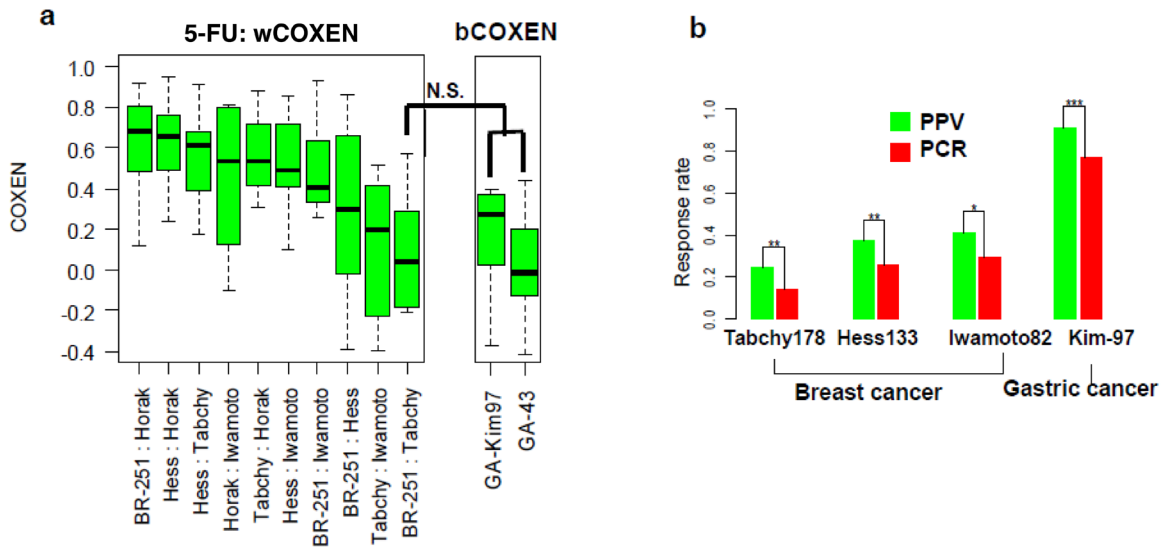

Supplementary Figure 5: 5-Fu: CONCORD cross-cancer prediction.

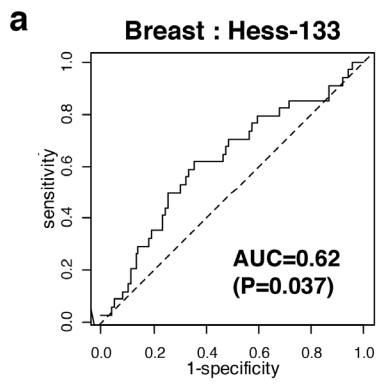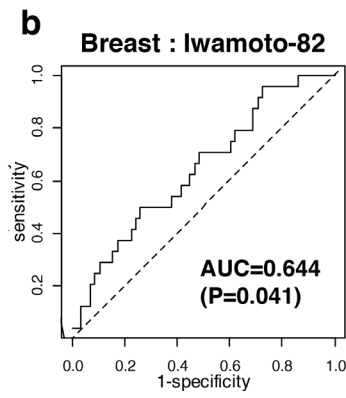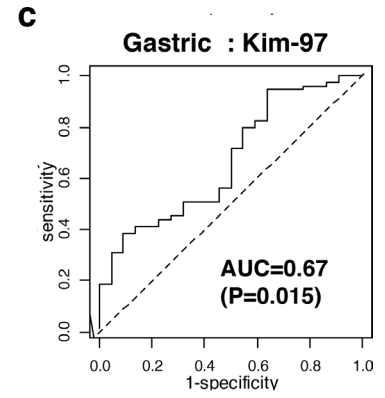

Supplementary Figure 6: 5-Fu: ROC curves of CONCORD prediction on breast and gastric cancers.

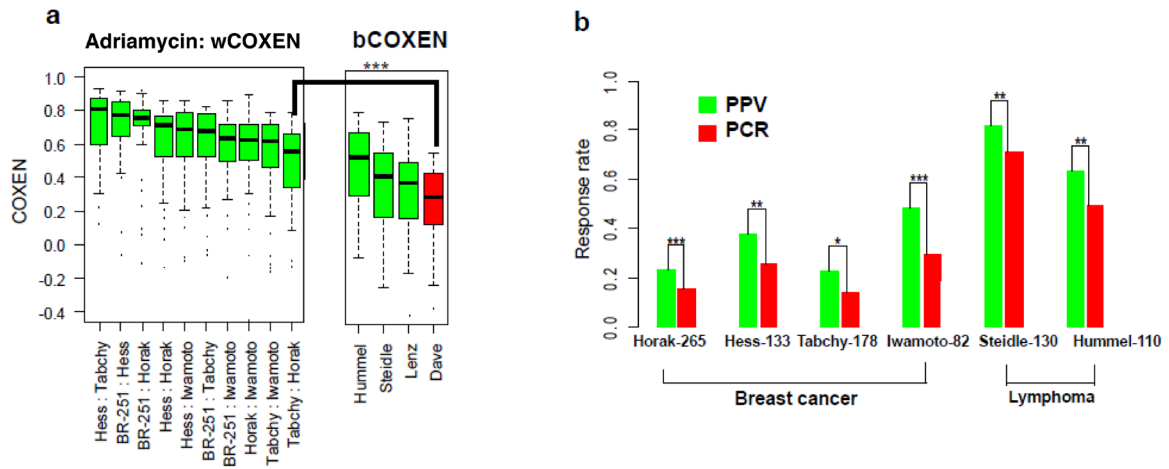

Supplementary Figure 7: Adriamycin: CONCORD prediction for breast cancer and lymphoma.

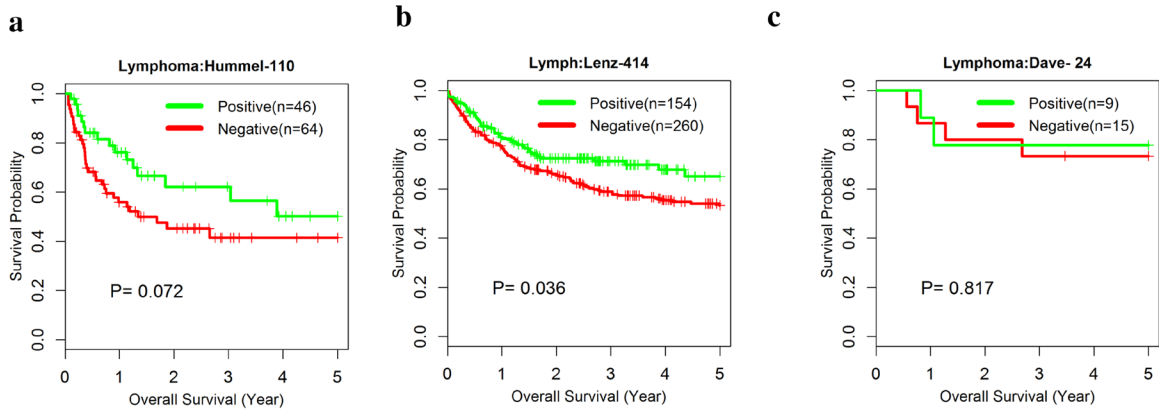

Supplementary Figure 8: Adriamycin: CONCORD prediction of overall survival in lymphoma.



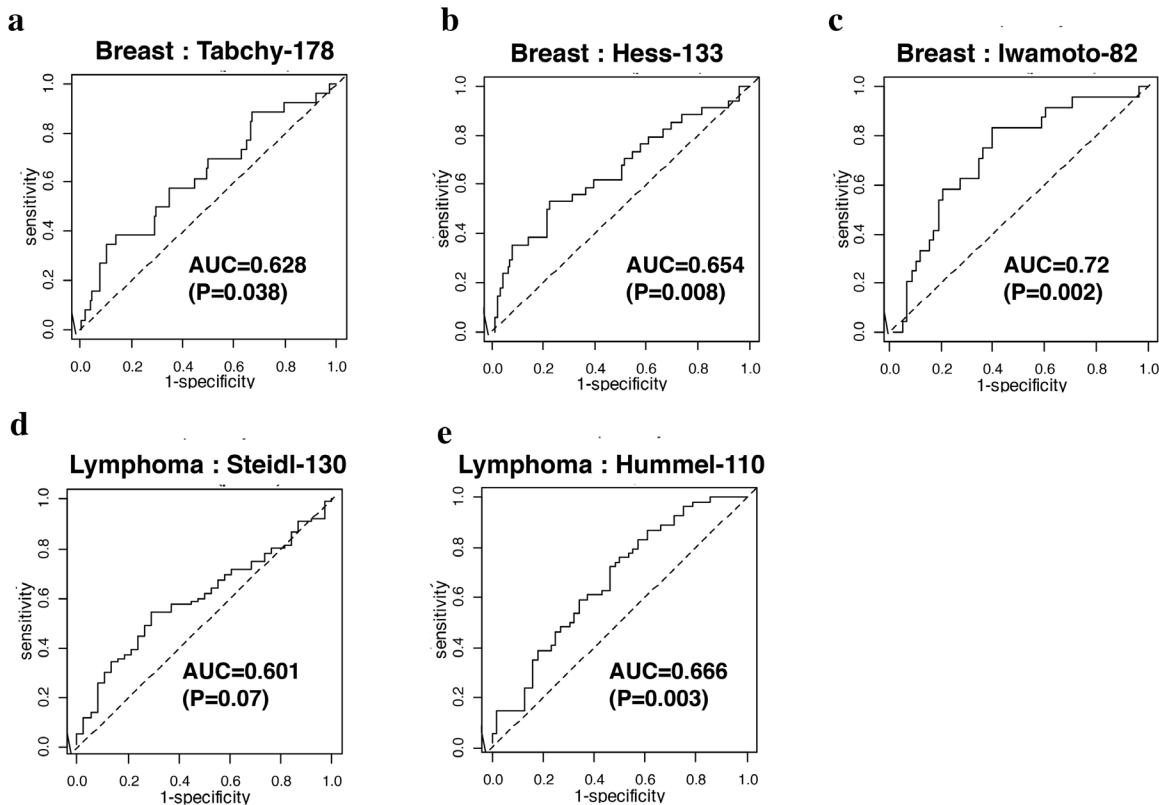

Supplementary Figure 9: Adriamycin: overall performance of CONCORD for breast and lymphoma.

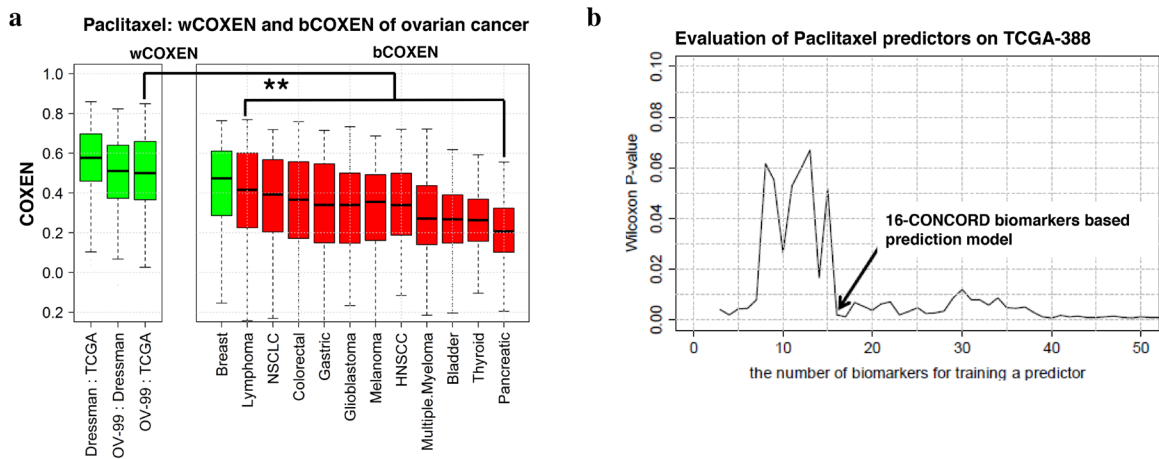

Supplementary Figure 10: Paclitaxel: CONCORD model development from ovarian cancer.

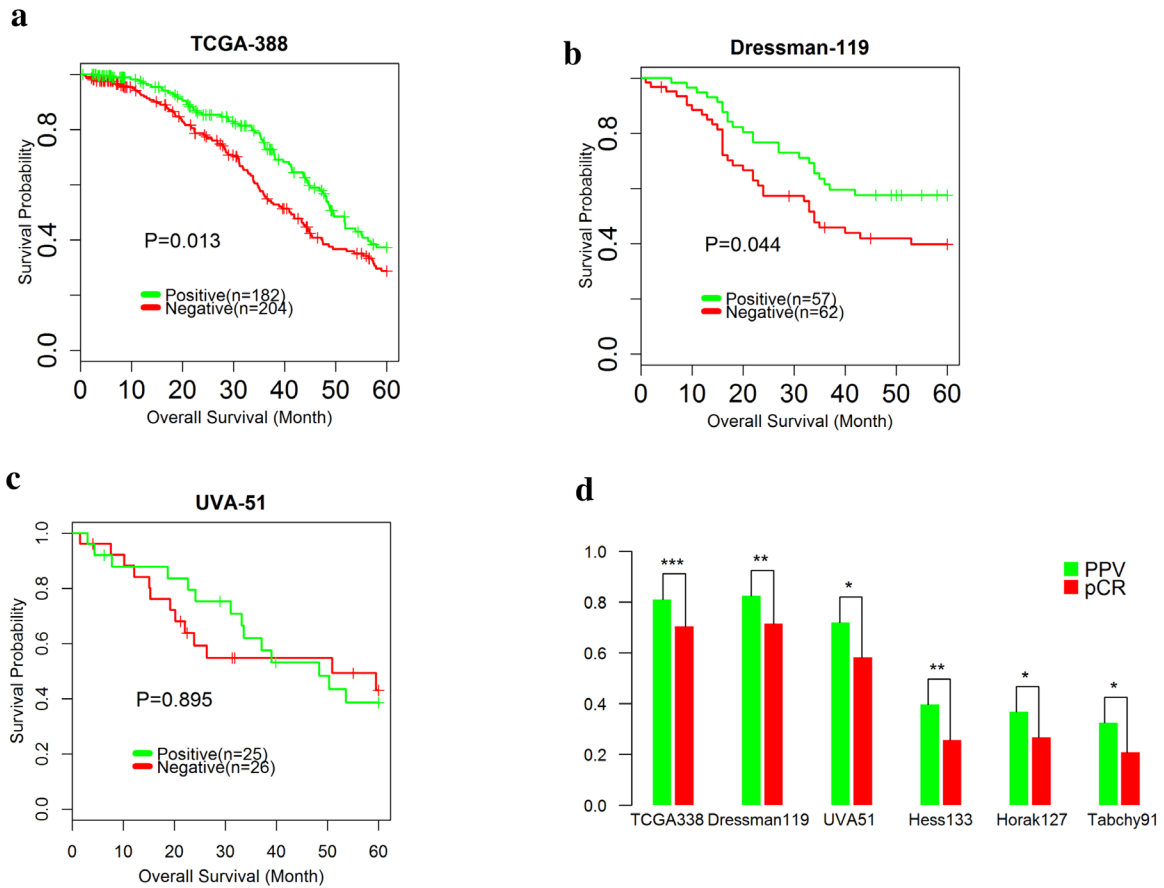

Supplementary Figure 11: Paclitaxel: Ovarian Cancer-to-Breast Cancer.

**a**

| rank | cmap name  | mean   | n | enrichment | p       | specificity | % non-null |
|------|------------|--------|---|------------|---------|-------------|------------|
| 107  | paclitaxel | -0.304 | 6 | -0.498     | 0.06786 | 0.1383      | 66         |

paclitaxel

| rank | batch | cmap name  | dose   | cell | score | up    | down  | instance_id |
|------|-------|------------|--------|------|-------|-------|-------|-------------|
| 3037 | 613   | paclitaxel | 5 µM   | HL60 | 0     | -.313 | -.202 | 2043        |
| 3434 | 714   | paclitaxel | 5 µM   | PC3  | 0     | -.387 | -.179 | 6720        |
| 4398 | 633   | paclitaxel | 5 µM   | MCF7 | -.387 | -.344 | .157  | 1542        |
| 4506 | 611   | paclitaxel | 5 µM   | PC3  | -.411 | -.246 | .286  | 1959        |
| 5035 | 111   | paclitaxel | 100 nM | MCF7 | -.493 | -.345 | .293  | 640         |
| 5272 | 729   | paclitaxel | 5 µM   | MCF7 | -.532 | -.519 | .170  | 5320        |

**b**

| rank | cmap name   | mean   | n | enrichment | p       | specificity | % non-null |
|------|-------------|--------|---|------------|---------|-------------|------------|
| 73   | doxorubicin | -0.634 | 3 | -0.772     | 0.02430 | 0.2481      | 100        |

doxorubicin

| rank | batch | cmap name   | dose | cell | score | up    | down | instance_id |
|------|-------|-------------|------|------|-------|-------|------|-------------|
| 4707 | 708   | doxorubicin | 7 µM | MCF7 | -.534 | -.326 | .179 | 5671        |
| 5635 | 655   | doxorubicin | 7 µM | MCF7 | -.674 | -.393 | .244 | 3291        |
| 5754 | 712   | doxorubicin | 7 µM | PC3  | -.695 | -.449 | .208 | 4610        |

Supplementary Figure 12: Connectivity Map Analysis of CONCORD Biomarkers.

**Supplementary Table 1: The result of biomarker discovery, three-way COXEN analysis and model selection**

See Supplementary File 1

**Supplementary Table 2: Ingenuity Pathway Analysis of Paclitaxel biomarkers**

See Supplementary File 2

**Supplementary Table 3: Ingenuity Pathway Analysis of 5-FU biomarkers**

See Supplementary File 3

**Supplementary Table 4: Ingenuity Pathway Analysis of Adriamycin biomarkers**

See Supplementary File 4

**Supplementary Table 5: Complete list of biomarkers of CONCORD predictors**

See Supplementary File 5

**Supplementary Table 6: The list of gene expression and chemotherapeutic response data of cancer cell lines and cancer patient cohorts**

See Supplementary File 6
